# Supplementary material
Source: PubMed Central journal article supplement (PMC6816100)
Supplement: supp_RA119.008781_144774_2_supp_385773_pwws4s.pdf [file supp_RA119.008781_144774_2_supp_385773_pwws4s.pdf]

## Supporting information

### Structural and functional evidence that lipoprotein LpqN supports cell envelope biogenesis in *M. tuberculosis*

Geoff C. Melly<sup>1</sup>, Haley Stokas<sup>1</sup>, Jennifer L. Dunaj<sup>1</sup>, Fong Fu Hsu<sup>2</sup>, Malligarjunan Rajavel<sup>3</sup>, Chih-Chia Su<sup>3</sup>, Edward W. Yu<sup>3</sup> and Georgiana E. Purdy<sup>1\*</sup>

**Supplemental Methods** ESI HPLC /MS analysis of lipid extracts

**Table S1.** Trimethoprim minimal inhibitory concentrations (MICs), determined via M-PFC, to assess interactions between MmpL3/11<sub>TB</sub> D2 domains and LpqN-family proteins.

**Table S2** Primers used in this study

**Figure S1** LpqN<sub>TB</sub> does not co-purify with MmpL11<sub>TB</sub> when co-expressed in *M. smegmatis*.

**Figure S2** LpqN<sub>TB</sub> does not co-purify with Ag85A<sub>TB</sub> when co-expressed in *M. smegmatis*.

**Figure S3.** Generation of H37Rv  $\Delta$ lpqN mutant and its initial characterization.

**Figure S4** Positive-ion ESI HPLC/MS analysis

**Figure S5** Negative-ion ESI HPLC/MS analysis

## Supplemental Materials

### *ESI HPLC /MS analysis of lipid extracts*

ESI HPLC/MS analysis was performed using an Agilent 6550 A QTOF instrument with an Agilent 1290 HPLC, operated by Agilent Masshunter software as previously described[1]. Separation of lipids was achieved by a Supelco 100 × 2.1 mm (2.7 µm particle size) Ascentis Express C-8 column at a flow rate of 250 µl/min. The mobile phase contained 5 mM ammonium formate (pH 5.0) both in solvent A, acetonitrile:water (60:40, v/v), and solvent B, isopropanol:acetonitrile (90:10, v/v). A gradient elution in the following manner was applied: 0 min; 68 % A, 0–3 min; 70% A, 3–8 min; 50% A, 8–13 min; 35% A, 13–18 min; 25% A, 18–28 min; 15% A, 28–33 min; 5% A, 33–40 min; 0% A, 40–50 min; 0% A, 50–51 min; 68% A, 51–60 min; 68% A.

1. Howard, N.C., Marin, N.D., Ahmed, M., Rosa, B.A., Martin, J., Bambouskova, M., Sergushichev, A., Loginicheva, E., Kurepina, N., Rangel-Moreno, J., Chen, L., Kreiswirth, B.N., Klein, R.S., Balada-Llasat, J.M., Torrelles, J.B., Amarasinghe, G.K., Mitreva, M., Artyomov, M.N., Hsu, F.F., Mathema, B., Khader, S.A.: Mycobacterium tuberculosis carrying a rifampicin drug resistance mutation reprograms macrophage metabolism through cell wall lipid changes. *Nat Microbiol* **3**, 1099-1108

**Table S1.** Trimethoprim minimal inhibitory concentrations (MICs), determined via M-PFC, to assess interactions between MmpL3/11<sub>TB</sub> D2 domains and LpqN-family proteins.

| Insert in pUAB200 | Insert in pUAB300                | Trim MIC ( $\mu\text{g/mL}$ ) |
|-------------------|----------------------------------|-------------------------------|
| -                 | Rv2763 (dfr)<br>positive control | >200                          |
| -                 | LpqT                             | 25                            |
| -                 | LprG                             | 25                            |
| -                 | Mtc28                            | 12.5                          |
| MmpL3 D2          | -                                | <6.25                         |
| MmpL3 D2          | LpqT                             | <6.25                         |
| MmpL3 D2          | LprG                             | <6.25                         |
| MmpL3 D2          | Mtc28                            | <6.25                         |
| MmpL11 D2         | -                                | <6.25                         |
| MmpL11 D2         | LpqT                             | 50                            |
| MmpL11 D2         | LprG                             | 50                            |
| MmpL11 D2         | Mtc28                            | 25                            |

**Table S2 Primers used in this study**

| <b>Name</b>      | <b>Primer (5'-3')</b>                       |
|------------------|---------------------------------------------|
| ΔlpqN 5' F       | tataagatcttagtcgtagccggcgtagtt              |
| ΔlpqN 5' R       | tataaagcttgctgctcggtcttgatgtga              |
| ΔlpqN 3' F       | tatatctagagcagaagacggtggtgattc              |
| ΔlpqN 3' R       | agctggfaccatgtggtagcggaaactcgac             |
| lpqN -865        | aggtgccatacagctgaac                         |
| lpqN +1637       | tcaagggaatcgagaagtgc                        |
| lpqN +367        | gcgatcctctccaaactcac                        |
| hyg primer 22    | tggctaaaatgtatcctaaatcag                    |
| hyg primer 3500  | tggtataacagacactgcttg                       |
| mmpL3D1.102      | atcaattggcaagcacgtcacgcagagc                |
| mmpL3D1.573      | atatcgateaacggcagcggcagcacttc               |
| mmpL3D2.990      | tacaattgcaatcctgggcaaacacgt                 |
| mmpL3D2.1185     | taatcgatecatcaccgggtaaccagcttg              |
| mmpL11D1.90      | atcaattgcgatgacgcagtcgggggaatc              |
| mmpL11D1.349     | atatcgatecgttcggcgttggaatc                  |
| mmpL11D2.1172    | aattcatatggtgctgggcaacagcttg                |
| mmpL11D2.1587    | ataggatcctcacggttgctcgcggacac               |
| lpqN.61          | atatcatatgagtttcaacatcaagaccgacag           |
| lpqN.687         | ataggatccttagggcgtgatggctcgtctc             |
| lpqN qRT.Forward | gcgatcctctccaaactcac                        |
| lpqN qRT.Reverse | ggaatcaccaccgtcttctg                        |
| lpqN.pUAB300.F   | aaggatccagttcaacatcaagaccgacag              |
| lpqN.pUAB300.R   | ttatcgatttagggcgtgatggctcgtctg              |
| lpqT.pUAB300.F   | taggatcctcggaccgaaatcgctg                   |
| lpqT.pUAB300.R   | ataagctttactttgccgcgacgacg                  |
| lprG.pUAB300.F   | cggtggaggtggtgggtccggatcctgctcgtcgggctcgaag |

|                 |                                                                                    |
|-----------------|------------------------------------------------------------------------------------|
| lprG.pUAB300.R  | tacgtcgacatcgataagcttcagctcaccgggggcttc                                            |
| mtc28.pUAB300.F | taggatccgatcccctgctgccaccg                                                         |
| mtc28.pUAB300.R | ataagcttctagcgcggcgggactgg                                                         |
| lpqN -570.F     | atgatatcgacctcgggtgcgtcgtg                                                         |
| lpqN +HA.R      | taaagcttttaagcgtaatctggaacatcgtatgggtagggcgtgatggtcgtctg                           |
| lpqN TAP.F      | atggatccggcaacatcgagatgctgccga                                                     |
| lpqN TAP.R      | tcaatgatgatgatgatgatgtcctcctcctcccttgcgtcatcgtctttgtagteggatccgggcgtgatggtcgtctgct |
| mmpL11 TAP.F    | atggatcccgcctcgaatgggccttca                                                        |
| mmpL11 TAP.R    | atggatcccctcgcctcctccaacatcg                                                       |
| Ag85A.F         | agtggatccccgggctgcagcgcgaagccgaagcggccctg                                          |
| Ag85A.R         | agtggtggtggtggtggtgtagcggcgcctggggcgcggg                                           |

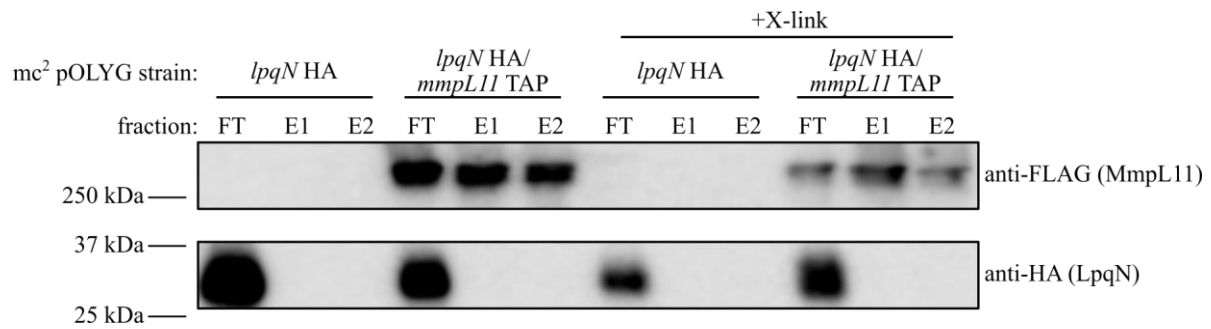

**Figure S1.** LpqN<sub>TB</sub> does not co-purify with MmpL1<sub>TB</sub> when co-expressed in *M. smegmatis*. HA-tagged LpqN and tandem (FLAG + HIS) affinity purification (TAP)-tagged MmpL11 were co-expressed in *M. smegmatis* mc<sup>2</sup>155 in the presence/absence of protein cross-linking agent (1% formaldehyde, +X-link). MmpL11 TAP was purified via HisPur affinity resin. Resin flow through (FT) and elutions 1 and 2 (E1/E2) were analyzed for the presence of MmpL11/LpqN protein via Western blot with anti-FLAG/anti-HA antibodies. *M. smegmatis* solely expressing HA-tagged LpqN serves as a negative control for non-specific binding.

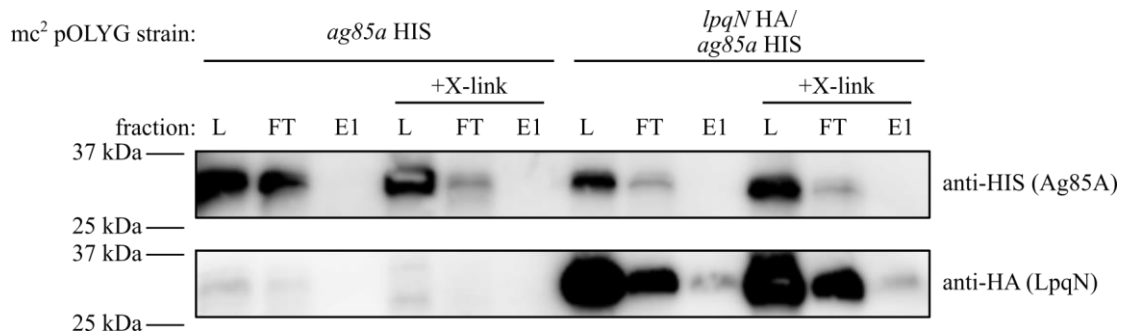

**Figure S2.** LpqN<sub>TB</sub> does not co-purify with Ag85A<sub>TB</sub> when co-expressed in *M. smegmatis*. HA-tagged LpqN and HIS-tagged Ag85A were co-expressed in *M. smegmatis* mc<sup>2</sup>155 in the presence/absence of protein cross-linking agent (1% formaldehyde, +X-link). LpqN HA was purified via anti-HA affinity resin. Crude lysate (L), resin flow through (FT), and elution 1 (E1) were analyzed for the presence of Ag85A/LpqN protein via Western blot with anti-HIS/anti-HA antibodies. *M. smegmatis* solely expressing HIS-tagged Ag85A serves as a negative control for non-specific binding.

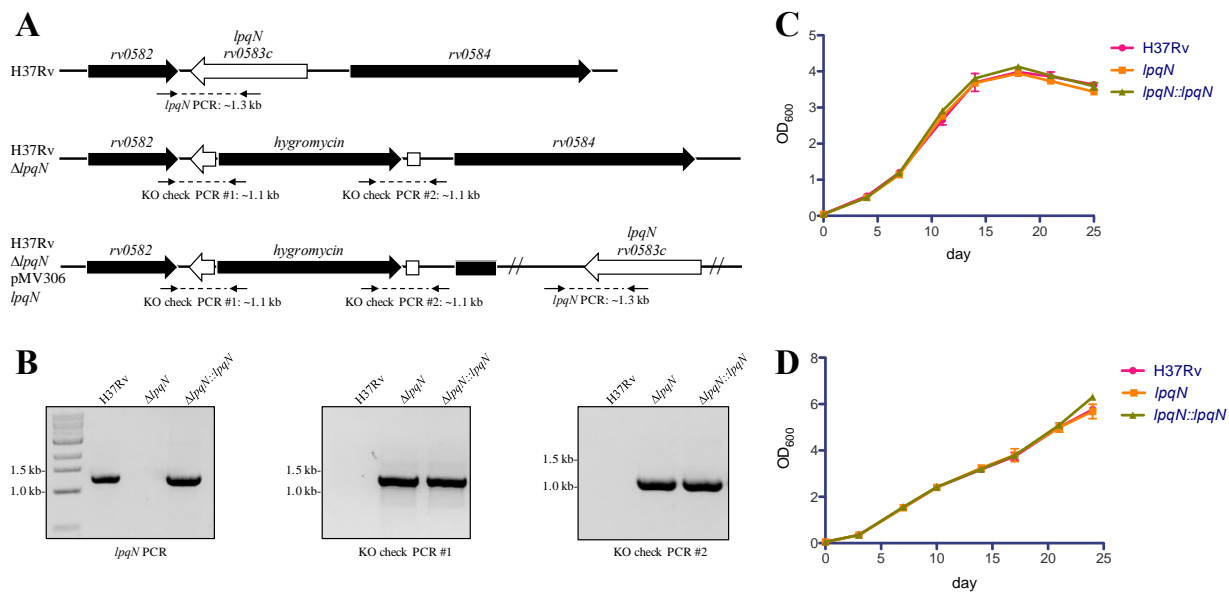

**Figure S3. Generation of H37Rv  $\Delta$ *lpqN*.** (A) Genomic organization of *rv0583c/lpqN* in *Mtb* H37Rv, *hyg* resistance cassette allelic exchange strategy ( $\Delta$ *lpqN*), and chromosomal complementation of *lpqN* using plasmid pMV306 ( $\Delta$ *lpqN*::*lpqN*). Diagnostic PCR products are indicated with dashed lines. (B) Diagnostic PCRs performed with genomic template DNA isolated from H37Rv,  $\Delta$ *lpqN*, and  $\Delta$ *lpqN*::*lpqN* *Mtb*. Primers used = *lpqN* PCR: *lpqN* +367/*lpqN* +1637; KO check PCR #1: *hyg* primer 3500/*lpqN* +1637; KO check PCR #2: *hyg* primer 22/*lpqN* -865. (C) Growth of *Mtb* strains in 7H9 medium. (D) Growth of *Mtb* strains in Sauton's medium.



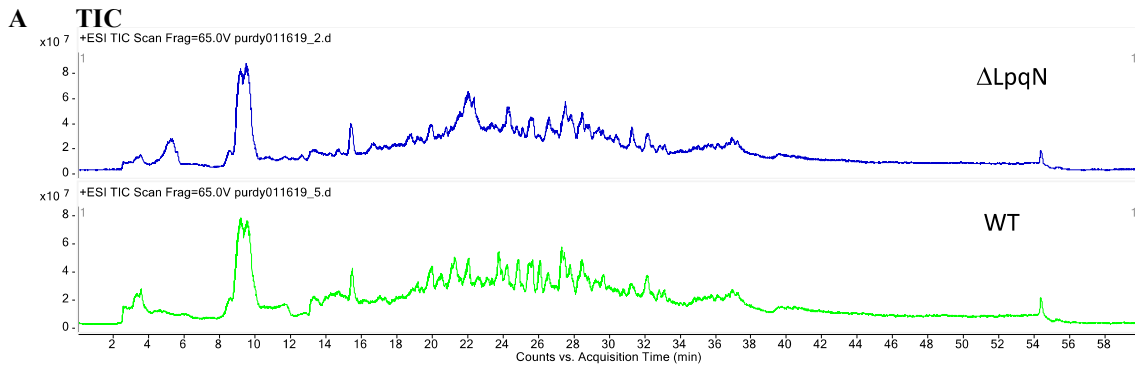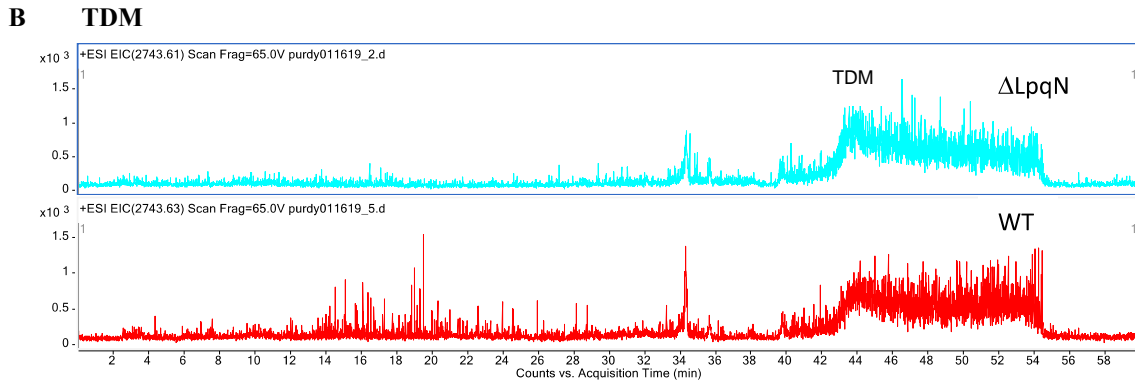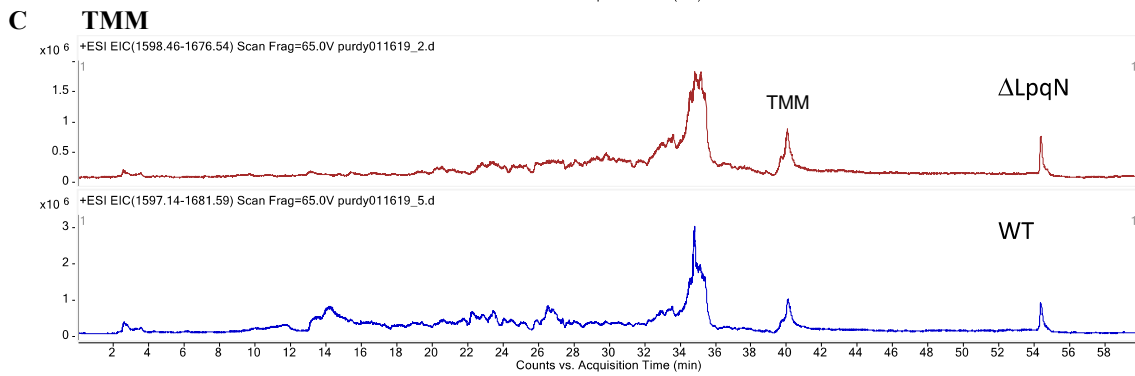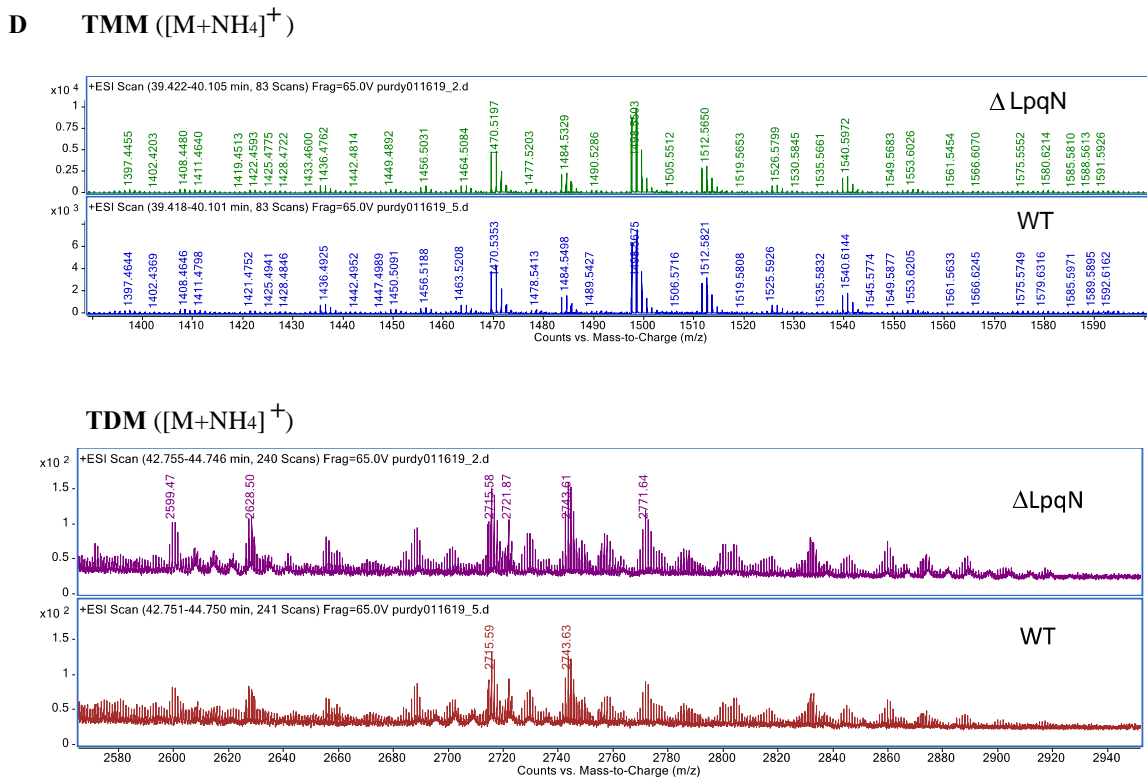

## E Wax ester

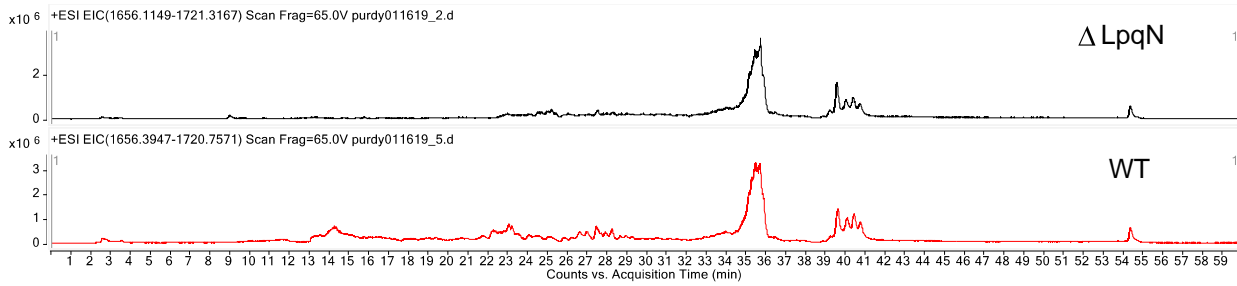

## F Wax ester ( $[M+NH_4]^+$ )

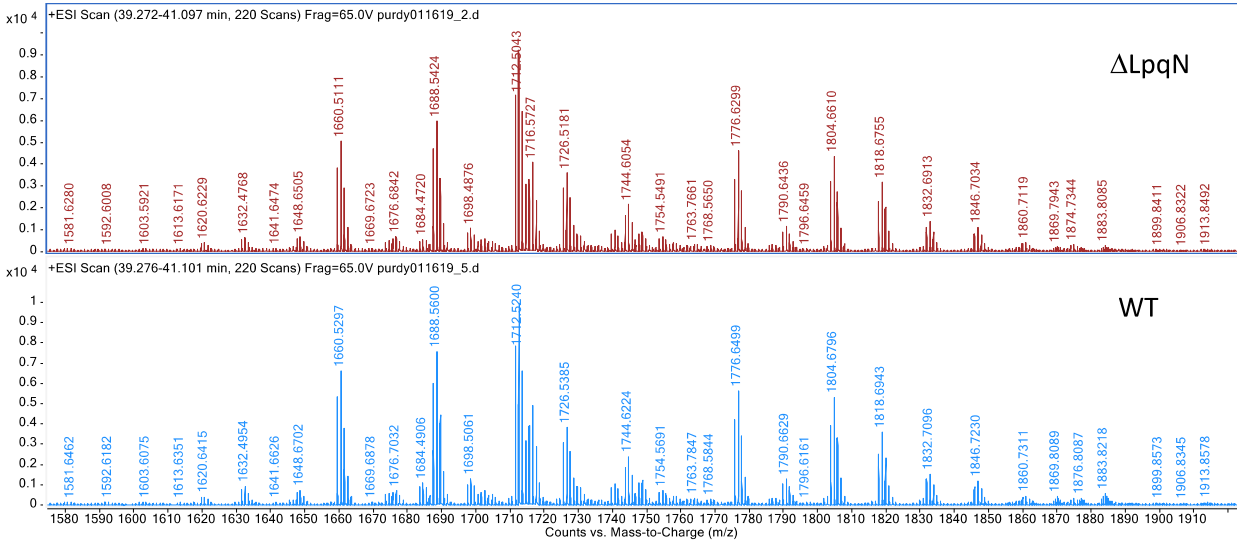

**Figure S4.** Positive-ion ESI HPLC/MS analysis of lipid extracts from wild type *M. tuberculosis* H37Rv and the *lpqN* mutant. (A) ESI HPLC/MS Total ion chromatogram (TIC) in the positive ion mode, (B) Selected ion chromatogram of TDM (elution time: 43-45.3 min), (C) Selected ion chromatogram of TMM (elution time: 39.5-40.5 min), (D) The ESI mass spectra of TMM  $[M + NH_4]^+$  ions (top panels) and TDM  $[M + NH_4]^+$  ions (bottom panels), (E) Selected ion chromatograms of wax ester (elution time: 39.5-41 min), (F) ESI MS spectra of the  $[M+ NH_4]^+$  ions of wax esters.

**A** TIC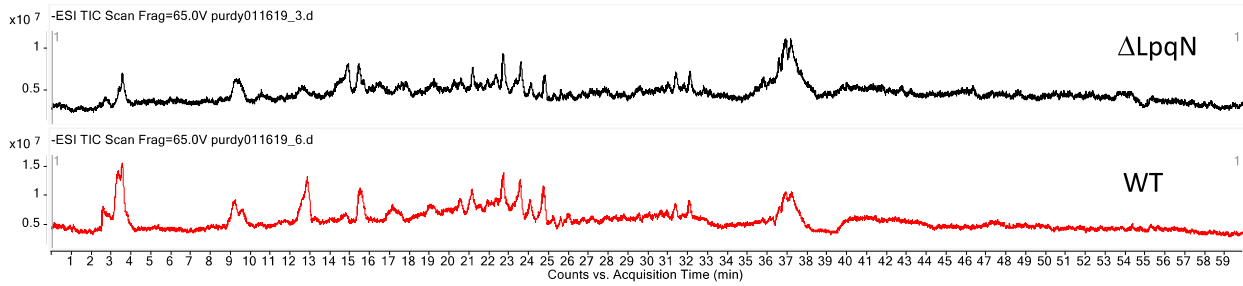**B** mycolic acids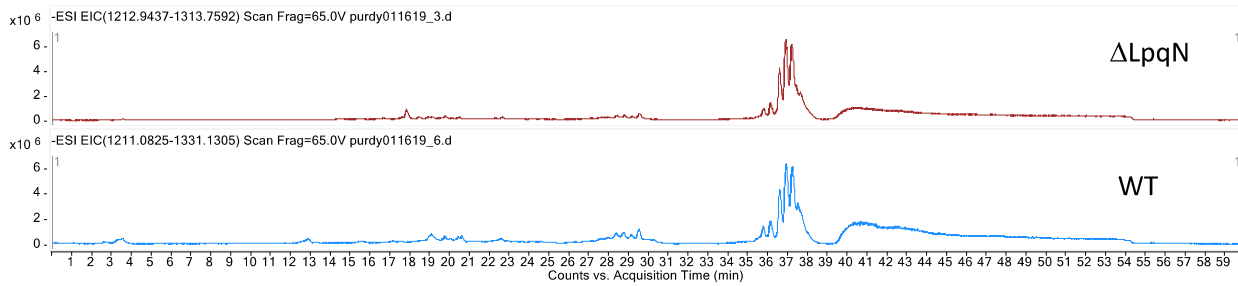**C** mycolic acids  $[M - H]^-$ 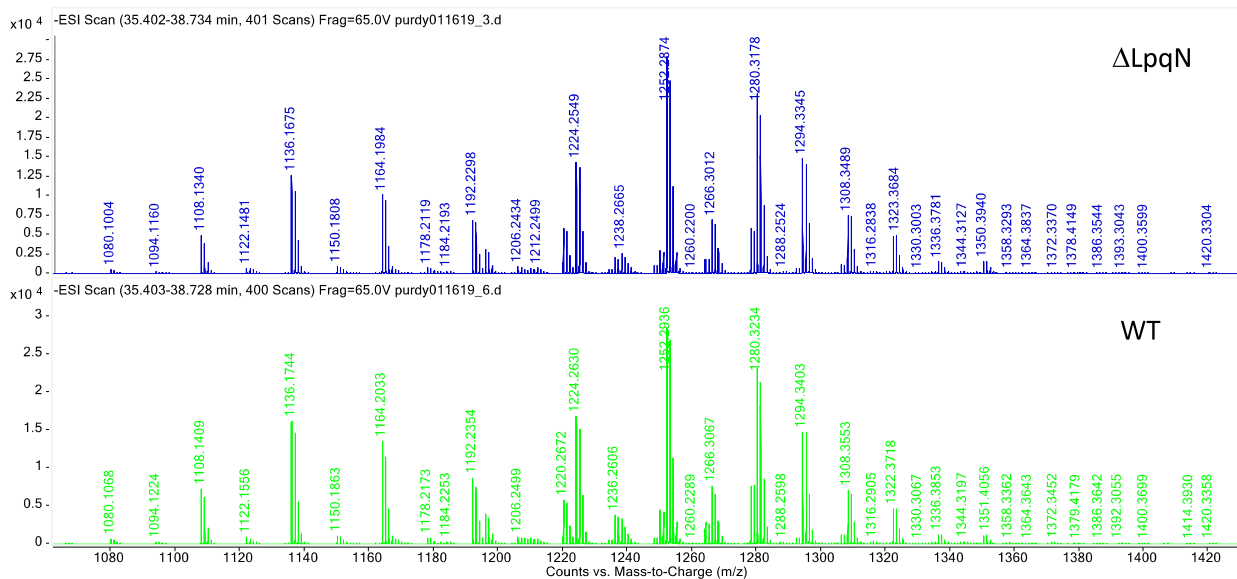

**Figure S5.** Negative-ion ESI HPLC/MS analysis of lipid extracts from wild type *M. tuberculosis* H37Rv and the *lpqN* mutant. (A) ESI HPLC/MS Total ion chromatogram (TIC) in the negative ion mode, (B) Selected ion chromatogram of mycolic acids (elution time: 35.5–38 min), (C) ESI MS spectra of the  $[M - H]^-$  ions of mycolic acids.
